# Supplementary material for: Differentiation-Dependent Regulation of Human Endogenous Retrovirus K Sequences and Neighboring Genes in Germ Cell Tumor Cells
Source: PubMed Central journal article supplement (PMC6013571; doi:10.3389/fmicb.2018.01253), 2018-06-15
Supplement: Data_Sheet_1.pdf [file Data_Sheet_1.pdf]

Differentiation-dependent regulation of human endogenous retrovirus K sequences  
and neighbouring genes in germ cell tumour cells

**Thomas Mueller, Claudia Hantsch, Ines Volkmer, Martin S. Staeger**

**Supplementary Material**

1. Supplementary Figure 1. Prove of absence of relevant DNA contamination in RNA isolated from tumour cells. Page 2
2. Supplementary Figure 2. Schematic presentation of the PRODH-DGCR5 region on human chromosome 22. Page 3
3. Sequence and BLAST results of PCR product from H12.1 cells with primer combination HERVKa Page 4-5
4. Sequence and BLAST results of PCR product from H12.1 cells with primer combination HERVb Page 6-7

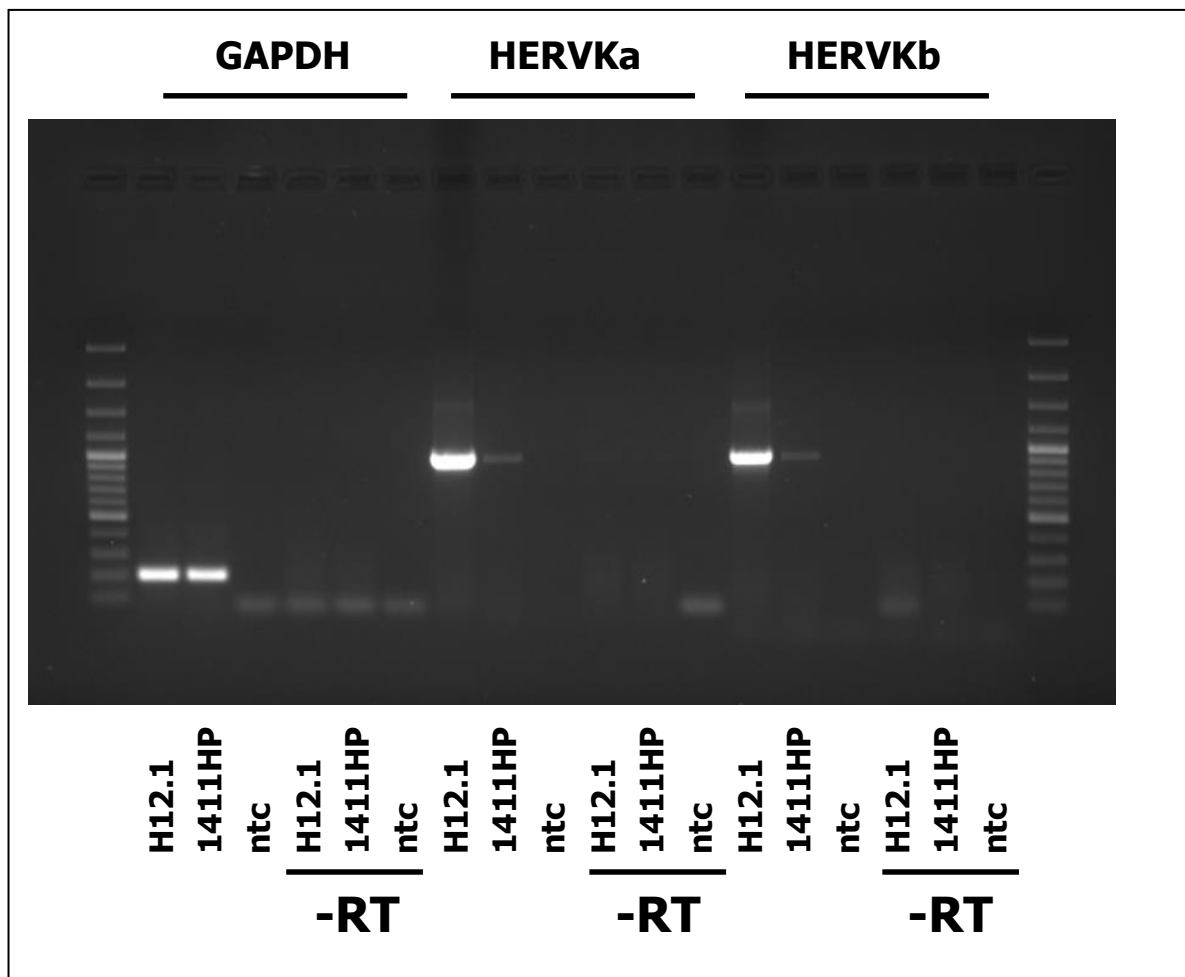

**Supplementary Figure 1. Prove of absence of relevant DNA contamination in RNA isolated from tumour cells.** RNA was isolated from indicated tumour cells, transcribed into cDNA and used as template for PCR with indicated primer combinations. In addition, RNA was processed without addition of reverse transcriptase (-RT) and used as target for PCR; ntc: no template control. GAPDH serves as housekeeping control and showed similar expression in both cell lines. HERVK signals were stronger in H12.1 cells than in 1411HP cells. Without reverse transcription, amplification was nearly undetectable.

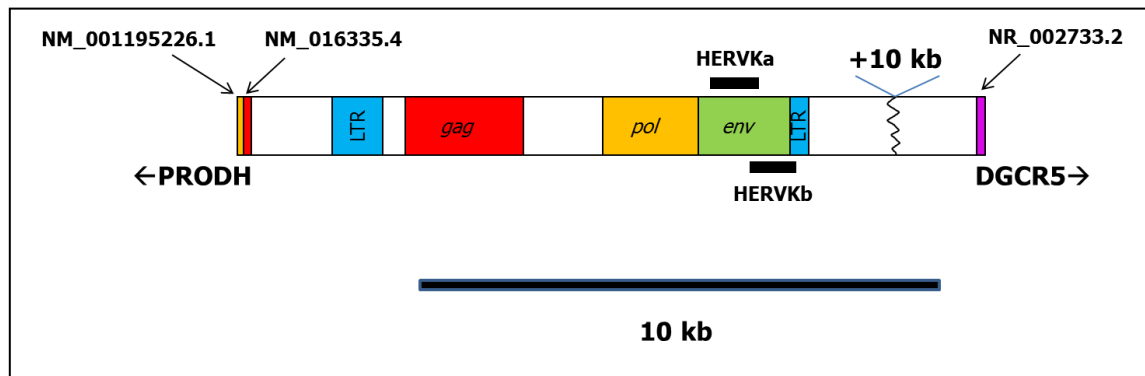

**Supplementary Figure 2. Schematic presentation of the PRODH-DGCR5 region on human chromosome 22.** For identification of ERV open reading frames, the intergenic region between PRODH and DGCR5 (accession number NC\_000022.11:18936553-18970498) was scanned with getorf (<http://www.hpa-bioinfotools.org.uk/pise/getorf.html>) for large (>1 kb) open reading frames. The predicted protein sequences were analysed with BLAST (<https://blast.ncbi.nlm.nih.gov/Blast.cgi>) in order to assign the open reading frames to the typical viral gene products. LTR were identified with RepeatMasker (<http://www.repeatmasker.org/>). Only the positions of the two LTR sequences flanking the HERV are shown. According to RepeatMasker, Both LTRs are from the same family LTR5. The position of the PCR amplicons generated with primer combinations HERVKa and HERVKb as well as the start positions of transcripts from PRODH and DGCR5 are shown. For PRODH, two different start positions of the mRNA have been described.

**Sequence of PCR product from H12.1 cells with primer combination HERVKa (without primer sequences):**

GCACCCGTAGCTGTGACTGCAATTAATCCCATAATCACTGCAATTAAGTAAAAATGAATCTTTTGGATCTATTTAAACACC  
 TTTTAATACTTCAGTCAAATATGGACGGATGGTGAGGCCCTCCACGGTCCGATGGACACAAGGATCCACACGCCCTCTC  
 TTGCTCTCACCAGCAGAATACGGTGTGCCAATTAAGGTTGAATCAATGCAAGTAAGCAATCTACAGTTTTCACAGGTATA  
 GTCTGGGAGTCTGGTTAATAACTATATTTTCTTACACTAGCATATAAGGGGGCTTTACGCAACTTTGTAAAGGAAGTGTAG  
 ACTGGAATTTAGGTGACAGTATAAAATGGCTTACGATCTCTTGTCTTAAAGTTTGAATTTCCAGACCAAATCTAATGTGGT  
 GTGAGGCCACAGTAAGCCTCCATAATCTGGATGTTTACAGACCAGAAACAGGACTTATATTTTTGGTCTTGGGGTAGAGATT  
 CCTTTTTCTCCCCATTTCCAAGGTTAGAAAGACTGCAATTTTTTATGCTTATGTTTGTCTAAACTTTCTGTTAAGTTCGTATC  
 AACAGCTGGACTCACTTGTGCACCTGGACATGACTGAGTTTGTCTGAGCAATTTGTGGTAGAATTGACCTCGAGGTGCCCAAT  
 CTATAATAGTTCCGAATTCATTGTTTTGTAATATCACCGCACTATTGGCCACACATTTCTCCAAACTAAAACCTTCTGTATTT  
 TTTGATTCTTTGGGAATTTCTTGGGGCAAGGTTTCCCTTTAGGTCTAAATTTAATGATCTTTGATAAGGAAAGTCTTGTA  
 ATAATTTACCCGTGGCCTGAGTGACATCCCGCTTACCATGTGATAAGTGAATCTACTGATGGGACTGACAAATAGGTACTTCTA  
 CC

**Blast result; best hit: Homo sapiens chromosome 22, GRCh38.p12 Primary Assembly (NC\_00022.11); Identities 100%, Gaps 0%:**

|       |          |                                                               |          |
|-------|----------|---------------------------------------------------------------|----------|
| Query | 1        | GCACCCGTAGCTGTGACTGCAATTAATCCCATAATCACTGCAATTAAGTAAAAATGAAT   | 60       |
|       |          |                                                               |          |
| Sbjct | 18946284 | GCACCCGTAGCTGTGACTGCAATTAATCCCATAATCACTGCAATTAAGTAAAAATGAAT   | 18946225 |
| Query | 61       | CTTTTGGATCTATTTAAACACCTTTTAATACTTCAGTCAAATATGGACGGATGGTGAG    | 120      |
|       |          |                                                               |          |
| Sbjct | 18946224 | CTTTTGGATCTATTTAAACACCTTTTAATACTTCAGTCAAATATGGACGGATGGTGAG    | 18946165 |
| Query | 121      | GCCTCCACGGTCCGATGGACACAAGGATCCACACGCCCTCTCTTGTCTCTCACCAGC     | 180      |
|       |          |                                                               |          |
| Sbjct | 18946164 | GCCTCCACGGTCCGATGGACACAAGGATCCACACGCCCTCTCTTGTCTCTCACCAGC     | 18946105 |
| Query | 181      | AGAATACGGTGTGCCAATTAAGTGAATCAATGCAAGTAAGCAATCTACAGTTTTCA      | 240      |
|       |          |                                                               |          |
| Sbjct | 18946104 | AGAATACGGTGTGCCAATTAAGTGAATCAATGCAAGTAAGCAATCTACAGTTTTCA      | 18946045 |
| Query | 241      | CAGGTTATAGTCTGGGAGTCTGGTTAATAACTATATTTCTTACAACCTAGCATATAAGG   | 300      |
|       |          |                                                               |          |
| Sbjct | 18946044 | CAGGTTATAGTCTGGGAGTCTGGTTAATAACTATATTTCTTACAACCTAGCATATAAGG   | 18945985 |
| Query | 301      | GGCTTTACGCAACTTTGTAAAGGAAGTGTAGACTGGAATTTAGGTCGACAGTATAAAAT   | 360      |
|       |          |                                                               |          |
| Sbjct | 18945984 | GGCTTTACGCAACTTTGTAAAGGAAGTGTAGACTGGAATTTAGGTCGACAGTATAAAAT   | 18945925 |
| Query | 361      | GGCTTACGATCTCTTGTCTTAAAGTTTGAATTTCCAGACCAAATCTAATGTGGTGTGAG   | 420      |
|       |          |                                                               |          |
| Sbjct | 18945924 | GGCTTACGATCTCTTGTCTTAAAGTTTGAATTTCCAGACCAAATCTAATGTGGTGTGAG   | 18945865 |
| Query | 421      | GCCACAGTAAGCCTCCATAATCTGGATGTTTACAGACCAGAAACAGGACTTATATTTTT   | 480      |
|       |          |                                                               |          |
| Sbjct | 18945864 | GCCACAGTAAGCCTCCATAATCTGGATGTTTACAGACCAGAAACAGGACTTATATTTTT   | 18945805 |
| Query | 481      | GGTCTTGGGGTAGAGATTCTTTTTCTCCCCATTCCCAAGGGTAGAAAGACTGCAATTTT   | 540      |
|       |          |                                                               |          |
| Sbjct | 18945804 | GGTCTTGGGGTAGAGATTCTTTTTCTCCCCATTCCCAAGGGTAGAAAGACTGCAATTTT   | 18945745 |
| Query | 541      | TTATGCTTATGTTTGTCTAAACTTTCGTGTTAAGTCGCTATCAACAGCTGGACTCACTTGT | 600      |
|       |          |                                                               |          |
| Sbjct | 18945744 | TTATGCTTATGTTTGTCTAAACTTTCGTGTTAAGTCGCTATCAACAGCTGGACTCACTTGT | 18945685 |
| Query | 601      | GCACCTGGACATGACTGAGTTTGTCTGAGCAATTTGGGTAGAATTGACCTCGAGGTGCC   | 660      |
|       |          |                                                               |          |
| Sbjct | 18945684 | GCACCTGGACATGACTGAGTTTGTCTGAGCAATTTGGGTAGAATTGACCTCGAGGTGCC   | 18945625 |
| Query | 661      | CAATCTATAATAGTTCCGAATTCATTGTTTTGTAATATCACCGCACTATTGGCCACACAT  | 720      |
|       |          |                                                               |          |
| Sbjct | 18945624 | CAATCTATAATAGTTCCGAATTCATTGTTTTGTAATATCACCGCACTATTGGCCACACAT  | 18945565 |
| Query | 721      | TCTTCCCAAATAAACTTCTGTATTTTTGATTCTTTGGGAATTTCTTGGGGCAAGGT      | 780      |
|       |          |                                                               |          |
| Sbjct | 18945564 | TCTTCCCAAATAAACTTCTGTATTTTTGATTCTTTGGGAATTTCTTGGGGCAAGGT      | 18945505 |
| Query | 781      | TTCCCTTTAGGTCTAAATTTAATGATCTTTGATAAGGAAAGTCTTGTAATAATTTACC    | 840      |
|       |          |                                                               |          |
| Sbjct | 18945504 | TTCCCTTTAGGTCTAAATTTAATGATCTTTGATAAGGAAAGTCTTGTAATAATTTACC    | 18945445 |
| Query | 841      | CGTGGCCTGAGTGACATCCCGCTTACCATGTGATAAGTGAATCTACTGATGGGACTGACA  | 900      |
|       |          |                                                               |          |
| Sbjct | 18945444 | CGTGGCCTGAGTGACATCCCGCTTACCATGTGATAAGTGAATCTACTGATGGGACTGACA  | 18945385 |
| Query | 901      | ATAGGTACTTCTACC 915                                           |          |
|       |          |                                                               |          |
| Sbjct | 18945384 | ATAGGTACTTCTACC 18945370                                      |          |



**Sequence of PCR product from H12.1 cells with primer combination HERVKb (without primer sequences):**

GAGAGCACGGGGTTGGGGTAAGGTTATAGATTAACAGAAaTCTCAAGGCAGAAGAATTTTCTTAGCACATAACAAAATGGAG  
TCTCCTATGTCTACTTCTTTCTACACAGACACAGTAACAATCTGATCTCTCTTGGCTTTTCCCCACATTTCCCCCTTTTCTTTT  
CGACAAAACCGCCATCGTCATCATGCCCCGTTCTCGATGGTCGCTGTCTCTTCGGAGCTGTTGGGTACACCTGCAGACTAACA  
ACAGACAAAACAGGCACACAAGGATTAATATGAGATTATAAATCGTAGTACTTCCAATGGTCTTAACCCAAGTGACAGGGTTA  
AGATTTGCGAGGCCATCAGCAACTCCTGCAATTGCCAGTTCCTGGCACCAAATTTAAATGGGCTTTTGATGCTTCGAAAAT  
TTGTTCTTTTAAATTTGGAAATGTCTAAAGTGAGATTATCTTCTCTTCCCTGTAGATGGCGTCTAACCATGTCCCAGTGATGCT  
CAGACTCATTATAAAATTTGGGGTGTAAATACAAAATCTGACGATTCAGTTCACATTGTAACCTGAAACGATGTTCTAAGCTC  
ATGAGTCTGTCTCCATCCAAATGACAGTTTGTCTAAGATCATTAAATTTGATTTGCCAATTTTGGATCAATACTAGATTGTGA  
ATTCACAATCTTGTAAGAATTTTTTTGCCAATCATTAACAAAAGTTTACTGACTGAACAGAAAGAGTGCAATGCAACTCCTGCTA  
CAGCACCCGTAGCTGTGACTGCAATTAATCCATAATCACTGCAATTAAGTAAAAATGAATCTTTTGGATCTATtTAAAAACA  
CCTTTTAATACTTCAGTCAAAATATGGACGGATGGTGAGGCCTCCCACGGTCCGTCCATGGACACAAGGATCCACACGCCCTC

**Blast result; best hit: Homo sapiens chromosome 22, GRCh38.p12 Primary Assembly (NC\_000022.11); Identities 100%, Gaps 0%:**

|       |          |                                                                |          |
|-------|----------|----------------------------------------------------------------|----------|
| Query | 1        | GAGAGCACGGGGTTGGGGTAAGGTTATAGATTAACAGAAATCTCAAGGCAGAAGAATTTT   | 60       |
|       |          |                                                                |          |
| Sbjct | 18947033 | GAGAGCACGGGGTTGGGGTAAGGTTATAGATTAACAGAAATCTCAAGGCAGAAGAATTTT   | 18946974 |
| Query | 61       | TCTTAGCACATAACAAAATGGAGTCTCCTATGTCTACTTCTTTCTACACAGACACAGTAA   | 120      |
|       |          |                                                                |          |
| Sbjct | 18946973 | TCTTAGCACATAACAAAATGGAGTCTCCTATGTCTACTTCTTTCTACACAGACACAGTAA   | 18946914 |
| Query | 121      | CAATCTGATCTCTCTTGCTTTTCCCCACATTTCCCCCTTTTCTTTTTCGACAAAACCGCCA  | 180      |
|       |          |                                                                |          |
| Sbjct | 18946913 | CAATCTGATCTCTCTTGCTTTTCCCCACATTTCCCCCTTTTCTTTTTCGACAAAACCGCCA  | 18946854 |
| Query | 181      | TCGTATCATGCCCCGTTCTCGATGGTCGCTGTCTCTTCGGAGCTGTTGGGTACACCTGC    | 240      |
|       |          |                                                                |          |
| Sbjct | 18946853 | TCGTATCATGCCCCGTTCTCGATGGTCGCTGTCTCTTCGGAGCTGTTGGGTACACCTGC    | 18946794 |
| Query | 241      | AGACTAACAACAGACAAAACAGGCACACAAGGATTAATATGAGATTATAATCGTAGTAC    | 300      |
|       |          |                                                                |          |
| Sbjct | 18946793 | AGACTAACAACAGACAAAACAGGCACACAAGGATTAATATGAGATTATAATCGTAGTAC    | 18946734 |
| Query | 301      | TTCCAATGGTCTTAACCCAAGTGACAGGGTTAAGATTTGCGAGGCCATCAGCAACTCCTG   | 360      |
|       |          |                                                                |          |
| Sbjct | 18946733 | TTCCAATGGTCTTAACCCAAGTGACAGGGTTAAGATTTGCGAGGCCATCAGCAACTCCTG   | 18946674 |
| Query | 361      | CAATTGCCCTCAGTTCCCTGGCACCAAATTTAAATGGGCTTTTGATGCTTCGAAAATTTGTT | 420      |
|       |          |                                                                |          |
| Sbjct | 18946673 | CAATTGCCCTCAGTTCCCTGGCACCAAATTTAAATGGGCTTTTGATGCTTCGAAAATTTGTT | 18946614 |
| Query | 421      | CTTTTAAATTTGGAAATGTCTAAAGTGAGATTATCTTCTCTTCCCTGTAGATGGCGTCTAA  | 480      |
|       |          |                                                                |          |
| Sbjct | 18946613 | CTTTTAAATTTGGAAATGTCTAAAGTGAGATTATCTTCTCTTCCCTGTAGATGGCGTCTAA  | 18946554 |
| Query | 481      | CCATGTCCCAGTGATGCTCAGACTCATTATAAAATTTGGGGTGTAAATACAAAATCTGACG  | 540      |
|       |          |                                                                |          |
| Sbjct | 18946553 | CCATGTCCCAGTGATGCTCAGACTCATTATAAAATTTGGGGTGTAAATACAAAATCTGACG  | 18946494 |
| Query | 541      | TATTCCAGTCACATTGTAACCTGGAACGATGTTCTAAGCTCATGAGTCTGTCTCCCATCC   | 600      |
|       |          |                                                                |          |
| Sbjct | 18946493 | TATTCCAGTCACATTGTAACCTGGAACGATGTTCTAAGCTCATGAGTCTGTCTCCCATCC   | 18946434 |
| Query | 601      | AAATGACAGTTTGTCTAAGATCATTAAATTTGATTTGCCAATTTTGTCAATACTAGATT    | 660      |
|       |          |                                                                |          |
| Sbjct | 18946433 | AAATGACAGTTTGTCTAAGATCATTAAATTTGATTTGCCAATTTTGTCAATACTAGATT    | 18946374 |
| Query | 661      | GTGAATTCACAATCTGTAGAAATTTTGGCAATCATTAACAAAGTTTACTGACTGAA       | 720      |
|       |          |                                                                |          |
| Sbjct | 18946373 | GTGAATTCACAATCTGTAGAAATTTTGGCAATCATTAACAAAGTTTACTGACTGAA       | 18946314 |
| Query | 721      | CAGAAGAGTGCAATGCAACTCCTGCTACAGCACCCGTAGCTGTGACTGCAATTAATCCCA   | 780      |
|       |          |                                                                |          |
| Sbjct | 18946313 | CAGAAGAGTGCAATGCAACTCCTGCTACAGCACCCGTAGCTGTGACTGCAATTAATCCCA   | 18946254 |
| Query | 781      | TAATCACTGCAATTAAGTAAAAATGAATCTTTGGATCTATTTAAAAACACCTTTTAAATA   | 840      |
|       |          |                                                                |          |
| Sbjct | 18946253 | TAATCACTGCAATTAAGTAAAAATGAATCTTTGGATCTATTTAAAAACACCTTTTAAATA   | 18946194 |
| Query | 841      | CTTCAGTCAAAAATATGACCGGATGGTGAGGCCTCCCACGGTCCGTCCATGGACACAAGGA  | 900      |
|       |          |                                                                |          |
| Sbjct | 18946193 | CTTCAGTCAAAAATATGACCGGATGGTGAGGCCTCCCACGGTCCGTCCATGGACACAAGGA  | 18946134 |
| Query | 901      | TCCACACGCCCTC 913                                              |          |
|       |          |                                                                |          |
| Sbjct | 18946133 | TCCACACGCCCTC 18946121                                         |          |

**Blast result; top hits:**

| Chromosome   | Start     | Stop      | identities |
|--------------|-----------|-----------|------------|
| NC_000022.11 | 18947033  | 18946121  | 913/913    |
| NC_000007.14 | 4583245   | 4584157   | 908/913    |
| NC_000001.11 | 75382639  | 75381727  | 907/913    |
| NC_000005.10 | 156658525 | 156659437 | 906/913    |
| NC_000011.10 | 101703709 | 101702797 | 904/913    |
| NC_000008.11 | 139460725 | 139461637 | 903/913    |

```

PCR_E : GAGGCAACGGGGTGGGGTAAGGTTATAGATTAAACGAAATCTCAAGGCAGAGAAATTTTCTTAGCACATAACAAAATGGAGCTCCCTATGCTACTTCTTTCTACACAGACAGTAAACA : 123
Chr22(r.c) : GAGGCAACGGGGTGGGGTAAGGTTATAGATTAAACGAAATCTCAAGGCAGAGAAATTTTCTTAGCACATAACAAAATGGAGCTCCCTATGCTACTTCTTTCTACACAGACAGTAAACA : 123
Chr7 : GAGGCAACGGGGTGGGGTAAGGTTATAGATTAAACGAAATCTCAAGGCAGAGAAATTTTCTTAGCACATAACAAAATGGAGCTCCCTATGCTACTTCTTTCTACACAGACAGTAAACA : 123
Chr1(r.c) : GAGGCAACGGGGTGGGGTAAGGTTATAGATTAAACGAAATCTCAAGGCAGAGAAATTTTCTTAGCACATAACAAAATGGAGCTCCCTATGCTACTTCTTTCTACACAGACAGTAAACA : 123
Chr5 : GAGGCAACGGGGTGGGGTAAGGTTATAGATTAAACGAAATCTCAAGGCAGAGAAATTTTCTTAGCACATAACAAAATGGAGCTCCCTATGCTACTTCTTTCTACACAGACAGTAAACA : 123
Chr11(r.c) : GAGGCAACGGGGTGGGGTAAGGTTATAGATTAAACGAAATCTCAAGGCAGAGAAATTTTCTTAGCACATAACAAAATGGAGCTCCCTATGCTACTTCTTTCTACACAGACAGTAAACA : 123
Chr8 : GAGGCAACGGGGTGGGGTAAGGTTATAGATTAAACGAAATCTCAAGGCAGAGAAATTTTCTTAGCACATAACAAAATGGAGCTCCCTATGCTACTTCTTTCTACACAGACAGTAAACA : 123
GAGAGCAcGGGGTgGGGGTAAGGT ATAGATTAAACGAAATCTCAAGGCAGAGAAATTTTCTTAG ACATAACAAAATGGAGTcCCCTATGCTACTTCTTTCTACACAGACAGTAAACA
    
```

```

PCR_E : TCGATCTCTCTGCTTTTCCCCAGATTTCCCTCTTTCTTTTTCGACAAAACCGCCATCGCTCATGCCCCCTCTGATGGTGGCTGTCTCTTGGAGCTGTGGGACACCTGCAGACTA : 246
Chr22(r.c) : TCGATCTCTCTGCTTTTCCCCAGATTTCCCTCTTTCTTTTTCGACAAAACCGCCATCGCTCATGCCCCCTCTGATGGTGGCTGTCTCTTGGAGCTGTGGGACACCTGCAGACTA : 246
Chr7 : TCGATCTCTCTGCTTTTCCCCAGATTTCCCTCTTTCTTTTTCGACAAAACCGCCATCGCTCATGCCCCCTCTGATGGTGGCTGTCTCTTGGAGCTGTGGGACACCTGCAGACTA : 246
Chr1(r.c) : TCGATCTCTCTGCTTTTCCCCAGATTTCCCTCTTTCTTTTTCGACAAAACCGCCATCGCTCATGCCCCCTCTGATGGTGGCTGTCTCTTGGAGCTGTGGGACACCTGCAGACTA : 246
Chr5 : TCGATCTCTCTGCTTTTCCCCAGATTTCCCTCTTTCTTTTTCGACAAAACCGCCATCGCTCATGCCCCCTCTGATGGTGGCTGTCTCTTGGAGCTGTGGGACACCTGCAGACTA : 246
Chr11(r.c) : TCGATCTCTCTGCTTTTCCCCAGATTTCCCTCTTTCTTTTTCGACAAAACCGCCATCGCTCATGCCCCCTCTGATGGTGGCTGTCTCTTGGAGCTGTGGGACACCTGCAGACTA : 246
Chr8 : TCGATCTCTCTGCTTTTCCCCAGATTTCCCTCTTTCTTTTTCGACAAAACCGCCATCGCTCATGCCCCCTCTGATGGTGGCTGTCTCTTGGAGCTGTGGGACACCTGCAGACTA : 246
TCGTACTCTCTTGGCTTTTCCCCAGATTTCCCTCTTTCTTTTTCGACAAAACCGCCATCGCTCATGCCCCCTCTGATGGTGGCTGTCTCTTGGAGCTGTGGGACACCTGCAGACTA
    
```

```

PCR_E : ACAACAGACAAAACAGGCACACAGGGTTAATAGGATTTAATGAGATTTAATGTAAGTCTACTTCCAAATGGCTTAAACCCAAAGGACAGGGGTAAAGATTGCGAGCCATCAGCAACTCCGCAATGGCT : 369
Chr22(r.c) : ACAACAGACAAAACAGGCACACAGGGTTAATAGGATTTAATGAGATTTAATGTAAGTCTACTTCCAAATGGCTTAAACCCAAAGGACAGGGGTAAAGATTGCGAGCCATCAGCAACTCCGCAATGGCT : 369
Chr7 : ACAACAGACAAAACAGGCACACAGGGTTAATAGGATTTAATGAGATTTAATGTAAGTCTACTTCCAAATGGCTTAAACCCAAAGGACAGGGGTAAAGATTGCGAGCCATCAGCAACTCCGCAATGGCT : 369
Chr1(r.c) : ACAACAGACAAAACAGGCACACAGGGTTAATAGGATTTAATGAGATTTAATGTAAGTCTACTTCCAAATGGCTTAAACCCAAAGGACAGGGGTAAAGATTGCGAGCCATCAGCAACTCCGCAATGGCT : 369
Chr5 : ACAACAGACAAAACAGGCACACAGGGTTAATAGGATTTAATGAGATTTAATGTAAGTCTACTTCCAAATGGCTTAAACCCAAAGGACAGGGGTAAAGATTGCGAGCCATCAGCAACTCCGCAATGGCT : 369
Chr11(r.c) : ACAACAGACAAAACAGGCACACAGGGTTAATAGGATTTAATGAGATTTAATGTAAGTCTACTTCCAAATGGCTTAAACCCAAAGGACAGGGGTAAAGATTGCGAGCCATCAGCAACTCCGCAATGGCT : 369
Chr8 : ACAACAGACAAAACAGGCACACAGGGTTAATAGGATTTAATGAGATTTAATGTAAGTCTACTTCCAAATGGCTTAAACCCAAAGGACAGGGGTAAAGATTGCGAGCCATCAGCAACTCCGCAATGGCT : 369
ACAACAGACAAAACAGGCACACAGGGTTAATAGGATTTAATGAGATTTAATGTAAGTCTACTTCCAAATGGCTTAAACCCAAAGGACAGGGGTAAAGATTGCGAGCCATCAGCAACTCCGCAATGGCT
    
```

```

PCR_E : CAGTCCGGCCCAAAATTTAAAAGGGCTTTTGAAGCTTGGAAAATTTGCTTTTAAATTTGGAAAATGCTAAAGGAGGATTTATCTCTCTCCCTGAGATGGGGCTAAACCACTGCCAGT : 492
Chr22(r.c) : CAGTCCGGCCCAAAATTTAAAAGGGCTTTTGAAGCTTGGAAAATTTGCTTTTAAATTTGGAAAATGCTAAAGGAGGATTTATCTCTCTCCCTGAGATGGGGCTAAACCACTGCCAGT : 492
Chr7 : CAGTCCGGCCCAAAATTTAAAAGGGCTTTTGAAGCTTGGAAAATTTGCTTTTAAATTTGGAAAATGCTAAAGGAGGATTTATCTCTCTCCCTGAGATGGGGCTAAACCACTGCCAGT : 492
Chr1(r.c) : CAGTCCGGCCCAAAATTTAAAAGGGCTTTTGAAGCTTGGAAAATTTGCTTTTAAATTTGGAAAATGCTAAAGGAGGATTTATCTCTCTCCCTGAGATGGGGCTAAACCACTGCCAGT : 492
Chr5 : CAGTCCGGCCCAAAATTTAAAAGGGCTTTTGAAGCTTGGAAAATTTGCTTTTAAATTTGGAAAATGCTAAAGGAGGATTTATCTCTCTCCCTGAGATGGGGCTAAACCACTGCCAGT : 492
Chr11(r.c) : CAGTCCGGCCCAAAATTTAAAAGGGCTTTTGAAGCTTGGAAAATTTGCTTTTAAATTTGGAAAATGCTAAAGGAGGATTTATCTCTCTCCCTGAGATGGGGCTAAACCACTGCCAGT : 492
Chr8 : CAGTCCGGCCCAAAATTTAAAAGGGCTTTTGAAGCTTGGAAAATTTGCTTTTAAATTTGGAAAATGCTAAAGGAGGATTTATCTCTCTCCCTGAGATGGGGCTAAACCACTGCCAGT : 492
CAGTTCCTGGCCAAATTTAAAAGGGCTTTTGAAGCTTGGAAAATTTGCTTTTAAATTTGGAAAATGCTAAAGGAGGATTTATCTCTCTCCCTGAGATGGGGCTAAACCACTGCCAGT
    
```

```

PCR_E : GATGCTCAGACTCATTATAAATTTGGGGTGAATACAAAATCTGACGTATTCAGTCCACATGTAAGTCCGAAACGATGTTCTAAGCTCATGAGTCTGCTCCCATCCAAATGACAGTTTGTG : 615
Chr22(r.c) : GATGCTCAGACTCATTATAAATTTGGGGTGAATACAAAATCTGACGTATTCAGTCCACATGTAAGTCCGAAACGATGTTCTAAGCTCATGAGTCTGCTCCCATCCAAATGACAGTTTGTG : 615
Chr7 : GATGCTCAGACTCATTATAAATTTGGGGTGAATACAAAATCTGACGTATTCAGTCCACATGTAAGTCCGAAACGATGTTCTAAGCTCATGAGTCTGCTCCCATCCAAATGACAGTTTGTG : 615
Chr1(r.c) : GATGCTCAGACTCATTATAAATTTGGGGTGAATACAAAATCTGACGTATTCAGTCCACATGTAAGTCCGAAACGATGTTCTAAGCTCATGAGTCTGCTCCCATCCAAATGACAGTTTGTG : 615
Chr5 : GATGCTCAGACTCATTATAAATTTGGGGTGAATACAAAATCTGACGTATTCAGTCCACATGTAAGTCCGAAACGATGTTCTAAGCTCATGAGTCTGCTCCCATCCAAATGACAGTTTGTG : 615
Chr11(r.c) : GATGCTCAGACTCATTATAAATTTGGGGTGAATACAAAATCTGACGTATTCAGTCCACATGTAAGTCCGAAACGATGTTCTAAGCTCATGAGTCTGCTCCCATCCAAATGACAGTTTGTG : 615
Chr8 : GATGCTCAGACTCATTATAAATTTGGGGTGAATACAAAATCTGACGTATTCAGTCCACATGTAAGTCCGAAACGATGTTCTAAGCTCATGAGTCTGCTCCCATCCAAATGACAGTTTGTG : 615
GATGCTCAGACTCATTATAAATTTGGGGTGAATACAAAATCTGACGTATTCAGTCCACATGTAAGTCCGAAACGATGTTCTAAGCTCATGAGTCTGCTCCCATCCAAATGACAGTTTGTG
    
```

```

PCR_E : TAAGTCAATTAATTTGATTTGCCAATTTTTGATCAACTACTAGATTGGAATTCACCAATCTTGTAGAATT TTTTGGCAATCATTAAACAAGTTTACTGACTGAACAGAGAGTGCATGCAA : 738
Chr22(r.c) : TAAGTCAATTAATTTGATTTGCCAATTTTTGATCAACTACTAGATTGGAATTCACCAATCTTGTAGAATT TTTTGGCAATCATTAAACAAGTTTACTGACTGAACAGAGAGTGCATGCAA : 738
Chr7 : TAAGTCAATTAATTTGATTTGCCAATTTTTGATCAACTACTAGATTGGAATTCACCAATCTTGTAGAATT TTTTGGCAATCATTAAACAAGTTTACTGACTGAACAGAGAGTGCATGCAA : 738
Chr1(r.c) : TAAGTCAATTAATTTGATTTGCCAATTTTTGATCAACTACTAGATTGGAATTCACCAATCTTGTAGAATT TTTTGGCAATCATTAAACAAGTTTACTGACTGAACAGAGAGTGCATGCAA : 738
Chr5 : TAAGTCAATTAATTTGATTTGCCAATTTTTGATCAACTACTAGATTGGAATTCACCAATCTTGTAGAATT TTTTGGCAATCATTAAACAAGTTTACTGACTGAACAGAGAGTGCATGCAA : 738
Chr11(r.c) : TAAGTCAATTAATTTGATTTGCCAATTTTTGATCAACTACTAGATTGGAATTCACCAATCTTGTAGAATT TTTTGGCAATCATTAAACAAGTTTACTGACTGAACAGAGAGTGCATGCAA : 738
Chr8 : TAAGTCAATTAATTTGATTTGCCAATTTTTGATCAACTACTAGATTGGAATTCACCAATCTTGTAGAATT TTTTGGCAATCATTAAACAAGTTTACTGACTGAACAGAGAGTGCATGCAA : 738
TAAGTCAATTAATTTGATTTGCCAATTTTTGATCAACTACTAGATTGGAATTCACCAATCTTGTAGAATT TTTTGGCAATCATTAAACAAGTTTACTGACTGAACAGAGAGTGCATGCAA
    
```

```

PCR_E : CTCTGCTACAGCA CCGTAGCTGTGACTGCAATTAATCCCATAACTGCAATTAAGTAAAATGAATCTTTTGGATCTATTAAAACACCTTTTAAATCTTCTAGCAAAATATGGAGGG : 861
Chr22(r.c) : CTCTGCTACAGCA CCGTAGCTGTGACTGCAATTAATCCCATAACTGCAATTAAGTAAAATGAATCTTTTGGATCTATTAAAACACCTTTTAAATCTTCTAGCAAAATATGGAGGG : 861
Chr7 : CTCTGCTACAGCA CCGTAGCTGTGACTGCAATTAATCCCATAACTGCAATTAAGTAAAATGAATCTTTTGGATCTATTAAAACACCTTTTAAATCTTCTAGCAAAATATGGAGGG : 861
Chr1(r.c) : CTCTGCTACAGCA CCGTAGCTGTGACTGCAATTAATCCCATAACTGCAATTAAGTAAAATGAATCTTTTGGATCTATTAAAACACCTTTTAAATCTTCTAGCAAAATATGGAGGG : 861
Chr5 : CTCTGCTACAGCA CCGTAGCTGTGACTGCAATTAATCCCATAACTGCAATTAAGTAAAATGAATCTTTTGGATCTATTAAAACACCTTTTAAATCTTCTAGCAAAATATGGAGGG : 861
Chr11(r.c) : CTCTGCTACAGCA CCGTAGCTGTGACTGCAATTAATCCCATAACTGCAATTAAGTAAAATGAATCTTTTGGATCTATTAAAACACCTTTTAAATCTTCTAGCAAAATATGGAGGG : 861
Chr8 : CTCTGCTACAGCA CCGTAGCTGTGACTGCAATTAATCCCATAACTGCAATTAAGTAAAATGAATCTTTTGGATCTATTAAAACACCTTTTAAATCTTCTAGCAAAATATGGAGGG : 861
CTCTGCTACAGCA CCGTAGCTGTGACTGCAATTAATCCCATAACTGCAATTAAGTAAAATGAATCTTTTGGATCTATTAAAACACCTTTTAAATCTTCTAGCAAAATATGGAGGG
    
```

```

PCR_E : ATGGGAGGECCTCCCAAGGGTGGTCCATGGACACAGGGATCCACAGCCCTC : 913
Chr22(r.c) : ATGGGAGGECCTCCCAAGGGTGGTCCATGGACACAGGGATCCACAGCCCTC : 913
Chr7 : ATGGGAGGECCTCCCAAGGGTGGTCCATGGACACAGGGATCCACAGCCCTC : 913
Chr1(r.c) : ATGGGAGGECCTCCCAAGGGTGGTCCATGGACACAGGGATCCACAGCCCTC : 913
Chr5 : ATGGGAGGECCTCCCAAGGGTGGTCCATGGACACAGGGATCCACAGCCCTC : 913
Chr11(r.c) : ATGGGAGGECCTCCCAAGGGTGGTCCATGGACACAGGGATCCACAGCCCTC : 913
Chr8 : ATGGGAGGECCTCCCAAGGGTGGTCCATGGACACAGGGATCCACAGCCCTC : 913
ATGG GAGGCTCCCAAGGGTGGTCCATGGACACAGGGATCCACAGCCCTC
    
```

r.c : reverse complement
